# Supplementary material for: Association between hypertension and retinal vascular features in ultra-widefield fundus imaging
Source: PubMed Central journal article supplement (PMC6999694; doi:10.1136/openhrt-2019-001124), 2020-01-08
Supplement: openhrt-2019-001124supp001.pdf [file openhrt-2019-001124supp001.pdf]

1 **Supplementary material**

2 Table S1: Repeatability of successive measurements (repeat and original) for nasal-annular  
 3 arteriole-venule ratio (NA-AVR) in: all eyes (All), left eyes (L) and right eyes (R). The arteriolar  
 4 and venular components ( $\mu\text{m}$ ) of NA-AVR are also shown. With Pearson's linear correlation  
 5 coefficient ( $R^2$ ), the 95% confidence interval (C) and 5% significance level (p). Significant p-  
 6 values in **bold**.

| Measure                      | Eye(s) | Pearson's linear correlation |            |        | Paired t-test |                |                  | N  |
|------------------------------|--------|------------------------------|------------|--------|---------------|----------------|------------------|----|
|                              |        | $R^2$                        | CI         | p      | Difference    | CI             | p                |    |
| NA-AVR (unity)               | All    | 0.82                         | 0.74, 0.88 | <0.005 | -0.01         | -0.02,<br>0.01 | 0.360            | 91 |
|                              | L      | 0.77                         | 0.61, 0.87 | <0.005 | -0.01         | -0.03,<br>0.01 | 0.502            | 45 |
|                              | R      | 0.86                         | 0.76, 0.92 | <0.005 | -0.01         | -0.02,<br>0.01 | 0.541            | 46 |
| arterioles ( $\mu\text{m}$ ) | All    | 0.91                         | 0.87, 0.94 | <0.005 | 0.0           | -1.5,<br>1.5   | 0.107            | 91 |
|                              | L      | 0.91                         | 0.83, 0.95 | <0.005 | 1.0           | -0.3,<br>2.3   | 0.141            | 45 |
|                              | R      | 0.92                         | 0.86, 0.96 | <0.005 | 0.4           | -0.7,<br>1.5   | 0.455            | 46 |
| venules ( $\mu\text{m}$ )    | All    | 0.91                         | 0.87, 0.94 | <0.005 | 1.3           | 0.4,<br>2.2    | <b>&lt;0.005</b> | 91 |
|                              | L      | 0.94                         | 0.89, 0.97 | <0.005 | 1.9           | 0.6,<br>3.2    | <b>0.006</b>     | 45 |
|                              | R      | 0.88                         | 0.79, 0.93 | <0.005 | 1.0           | -0.4,<br>2.3   | 0.180            | 46 |

7

8

1 Table S2: Area under receiver operator characteristic curve (AUC) for nasal-annular arteriole-  
 2 venule ratio (NA-AVR) as a detector of hypertensive status in the study cohort. The arteriolar  
 3 and venular components ( $\mu\text{m}$ ) used to calculate NA-AVR are also given.  $\text{AVR}_5$  uses the 5  
 4 widest arteriolar and venular segments, and  $\text{AVR}_{\text{max}}$  uses the widest arteriolar and venular  
 5 segments. With 95% confidence intervals (CI) and 5% significance level (p). Significant p-  
 6 values in **bold**.

| Measure                      | Group | Left Eye |            | Right Eye |            | P                |
|------------------------------|-------|----------|------------|-----------|------------|------------------|
|                              |       | AUC      | CI         | AUC       | CI         |                  |
| NA-AVR                       | All   | 0.73     | 0.68, 0.78 | 0.64      | 0.59, 0.70 | <b>0.020</b>     |
|                              | M     | 0.77     | 0.70, 0.83 | 0.59      | 0.51, 0.67 | <b>&lt;0.005</b> |
|                              | F     | 0.72     | 0.63, 0.78 | 0.68      | 0.58, 0.76 | 0.502            |
| arterioles ( $\mu\text{m}$ ) | All   | 0.70     | 0.65, 0.75 | 0.66      | 0.60, 0.71 | 0.307            |
|                              | M     | 0.71     | 0.63, 0.77 | 0.62      | 0.54, 0.70 | 0.101            |
|                              | F     | 0.71     | 0.63, 0.78 | 0.68      | 0.59, 0.75 | 0.616            |
| venules ( $\mu\text{m}$ )    | All   | 0.53     | 0.47, 0.59 | 0.52      | 0.47, 0.58 | 0.808            |
|                              | M     | 0.49     | 0.40, 0.57 | 0.52      | 0.43, 0.60 | 0.611            |
|                              | F     | 0.57     | 0.47, 0.65 | 0.55      | 0.46, 0.64 | 0.749            |
| $\text{AVR}_5$               | All   | 0.69     | 0.64, 0.74 | 0.63      | 0.57, 0.69 | 0.130            |
|                              | M     | 0.74     | 0.66, 0.80 | 0.58      | 0.49, 0.65 | <b>&lt;0.005</b> |
|                              | F     | 0.66     | 0.58, 0.74 | 0.68      | 0.58, 0.76 | 0.742            |
| $\text{AVR}_{\text{max}}$    | All   | 0.68     | 0.63, 0.73 | 0.63      | 0.58, 0.69 | 0.209            |
|                              | M     | 0.70     | 0.62, 0.77 | 0.61      | 0.53, 0.69 | 0.104            |
|                              | F     | 0.67     | 0.58, 0.74 | 0.62      | 0.53, 0.70 | 0.416            |

7

1 Figure S1: Bland-Altman plots for measurement repeatability of the arteriolar and venular  
2 components ( $\mu\text{m}$ ) of nasal-annular arteriole-venule ratio, showing the difference between  
3 successive measurements (repeat – original) on the y-axis and the average of the two  
4 measurements on the x-axis for: arterioles in (a) all eyes, (b) left eyes, (c) right eyes, and  
5 venules in (d) all eyes, (e) left eyes and (e) right eyes.

6
