# Supplementary material for: Association between hypertension and retinal vascular features in ultra-widefield fundus imaging
Source: PubMed Central journal article supplement (PMC6999694; doi:10.1136/openhrt-2019-001124), 2020-01-08

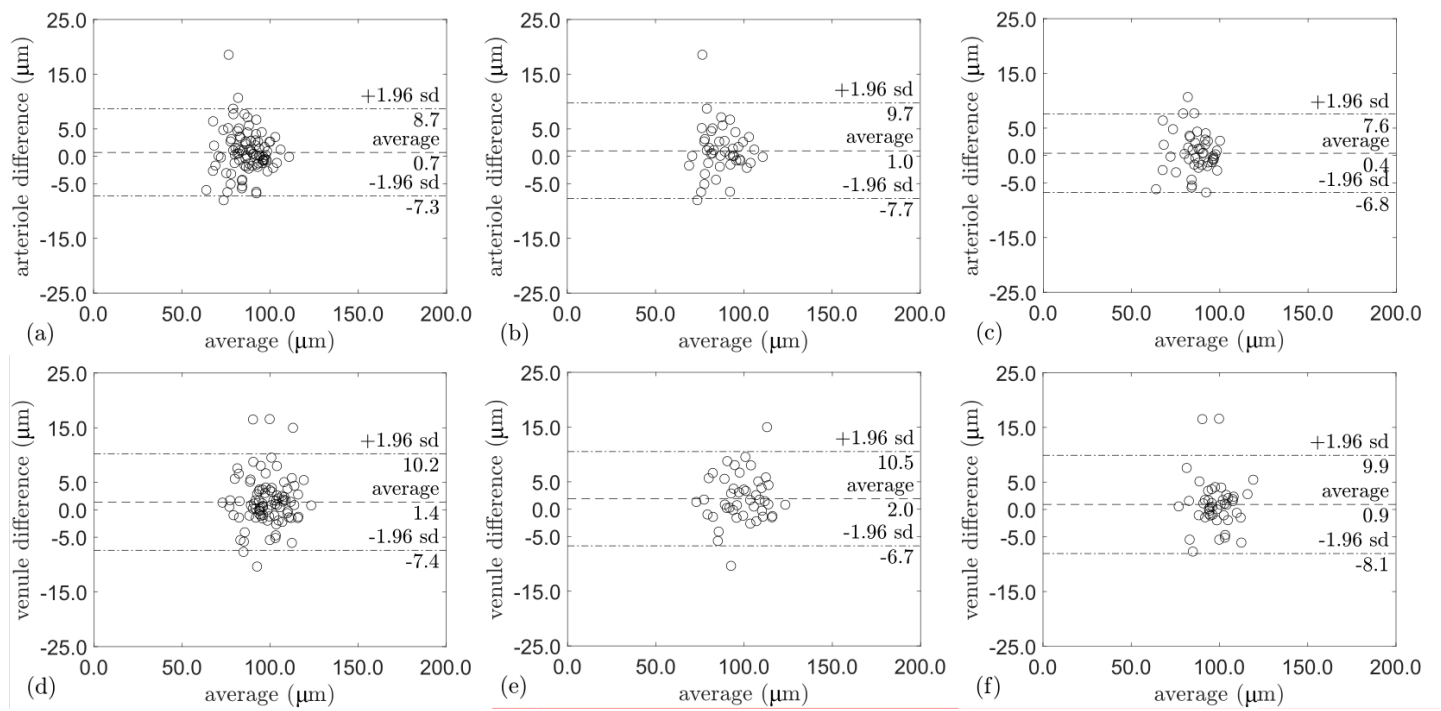

Supplement: openhrt-2019-001124supp002.pdf [file openhrt-2019-001124supp002.pdf]
